# Supplementary material for: ZIF-95 as a filler for enhanced gas separation performance of polysulfone membrane
Source: Royal Society of Chemistry journal article supplement (doi:10.1039/d1ra06271a), 2021-01-01
Supplement: d1ra06271a1.pdf [file d1ra06271a1.pdf]

## SUPPLEMENTARY INFORMATION

### “ZIF-95 as a Filler for Enhanced Gas Separation Performance of Polysulfone Membrane”

Sanaullah Shafiq <sup>a</sup>, Bassem A. Al-Maythalony <sup>b,c</sup>, Muhammad Usman <sup>d</sup>, Mohammad Saleh Ba-Shammakh <sup>a</sup>, Abdallah A. Al-Shammari <sup>a,\*</sup>

<sup>a</sup> Chemical Engineering Department, King Fahad University of Petroleum and Minerals, Dhahran 31261, Saudi Arabia.

<sup>b</sup> King Abdulaziz City for Science and Technology—Technology Innovation Centre on Carbon Capture and Sequestration (KACST-TIC on CCS) at King Fahd University of Petroleum and Minerals, Dhahran 31261, Saudi Arabia.

<sup>c</sup> Material Discovery Unit-Research and Development, Royal Scientific Society (RSS), Amman 11941, Jordan.

<sup>d</sup> Center of Research Excellence in Nanotechnology, King Fahd University of Petroleum and Minerals, Dhahran 31261, Saudi Arabia.

\*Correspondence should be addressed at: [alshammari@kfupm.edu.sa](mailto:alshammari@kfupm.edu.sa)

| <b>Table of Content</b> |                                               | <b>Page</b> |
|-------------------------|-----------------------------------------------|-------------|
| <b>Section 1.</b>       | CO <sub>2</sub> Adsorption Isotherm of ZIF-95 | 1           |
| <b>Section 2.</b>       | Activation Procedure                          | 1           |
| <b>Section 3.</b>       | Permeability Calculations                     | 1-2         |
| <b>Section 4.</b>       | EDS Mapping of Cross-Section of Membranes     | 3           |
| <b>Section 5.</b>       | DSC Data of Membranes                         | 4           |
| <b>Section 6.</b>       | Permeabilities & Selectivity                  | 5           |
| <b>Section 7.</b>       | Diffusivity and Solubility                    | 6-7         |
| <b>Section 8.</b>       | Literature of MMM                             | 8-13        |
| <b>Section 9.</b>       | Upper Bounds                                  | 14-20       |
| <b>Section 10.</b>      | References                                    | 21-22       |

**S1. CO<sub>2</sub> Adsorption Isotherm of ZIF-95:**

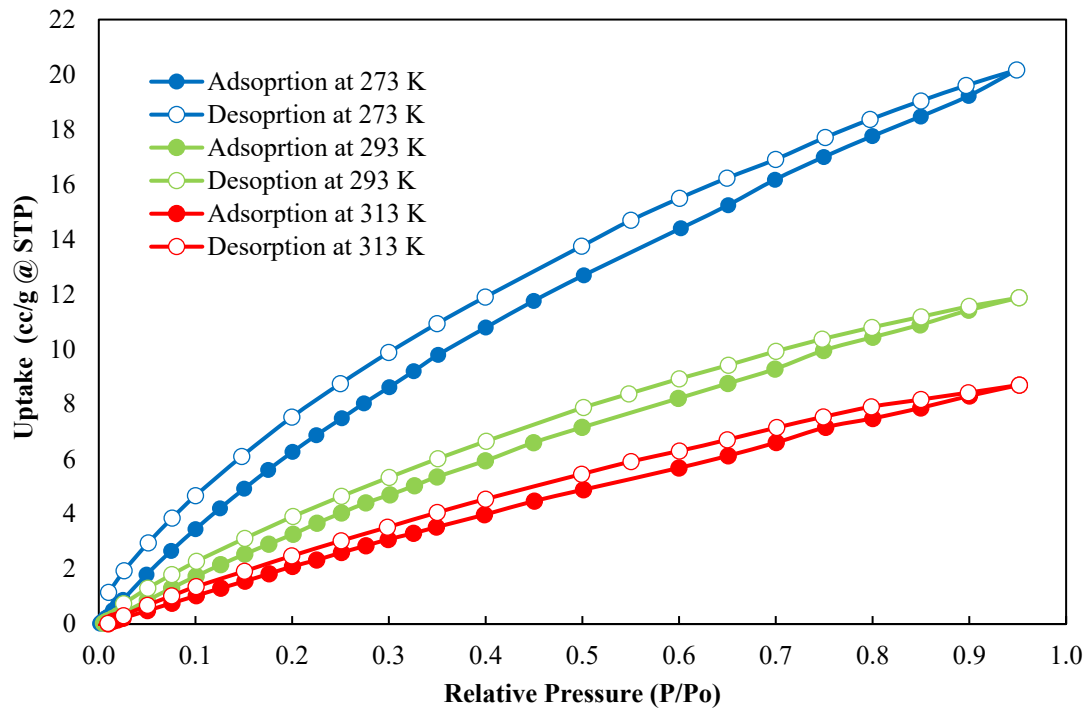

**Fig. S1.** Adsorption and desorption isotherms of CO<sub>2</sub> at 273 K (blue), 293 K (green), and 313 K (red) for synthesized ZIF-95.

**Clausius-Clapeyron equation:**

$$Q_{st} = -R \frac{\partial \ln p}{\partial \left(\frac{1}{T}\right)} \dots \dots \dots (eq. S1)$$

Where,  $Q_{st}$  is the isosteric heat of adsorption in kJ/mol,  $R$  is the general gas constant (kJ/mol.K),  $p$  is the relative pressure, and  $T$  is the temperature (Kelvin).

**S2. Activation Procedure:**

Acetone was used to solvent exchange the DMF from ZIF-95 crystals. As-synthesized sample was immersed in acetone for 5 days during which acetone was refreshed 2 to 3 times in a day. Afterward, the crystals of ZIF-95 were partially dried overnight in the fume hood. The degassing of the partially dried sample was done using a vacuum degassing option on Autosorb iQ equipment. The sample was first heated to 50 °C for 10 hours and then to 110 °C for 12 hours under vacuum.

**S3. Permeability calculations:**

$$P_i = \frac{Flux_i \cdot L}{\Delta p} \dots \dots \dots (eq. S2)$$

Where,  $P_i$  is the permeability of gas “ $i$ ” in “Barrer”,  $L$  is the thickness of membrane in “ $cm$ ”,  $\Delta p$  is the pressure difference across the membrane in “ $cmHg$ ”, and  $F_i$  is the flux of gas “ $i$ ”. The flux of gas “ $i$ ” was calculated using the following equation:

$$F_i = 10^{10} \left( \frac{dp_d^{SS}}{dt} - \frac{dp_d^{LR}}{dt} \right) \cdot V_d \cdot ART \dots \dots \dots (eq.S3)$$

where,

$A$  = Area of membrane ( $cm^2$ )

$V_d$  = Volume of down stream ( $cm^3$ )

$R$  = General gas constant [  $0.278 \text{ cm}^3 \text{ cmHg}/(\text{cm}^3(\text{STP})K$  ]

$T$  = Temperature (Kelvin)

$\frac{dp_d^{SS}}{dt}$  = Pressure rise in down stream at steady state ( $cmHg/s$ )

$\frac{dp_d^{LR}}{dt}$  = Leak rate on the down stream ( $cmHg/s$ )

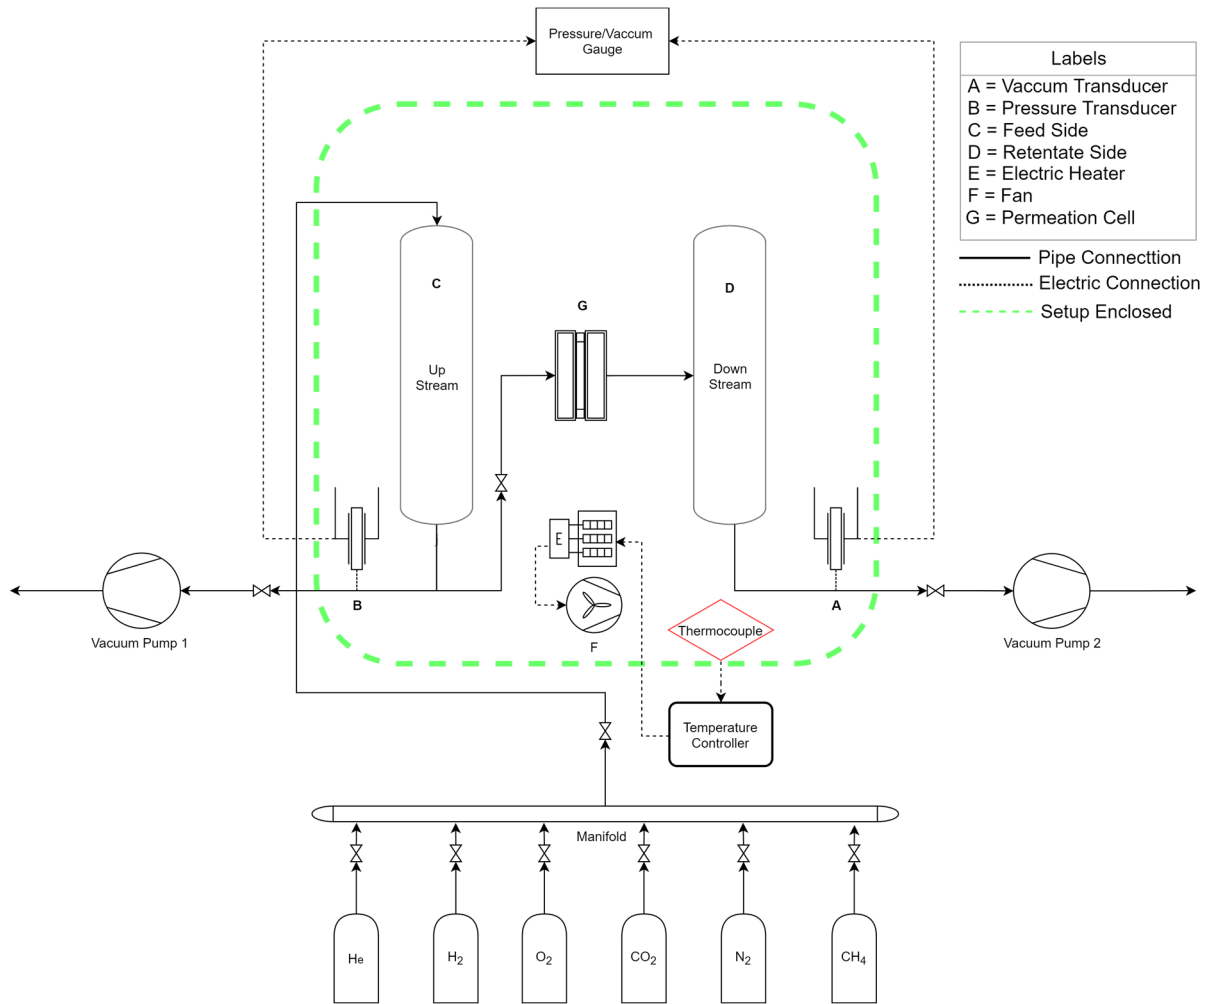

**Fig. S2.** The schematic diagram of permeation setup.

#### S4. EDS Mapping of Cross-Section:

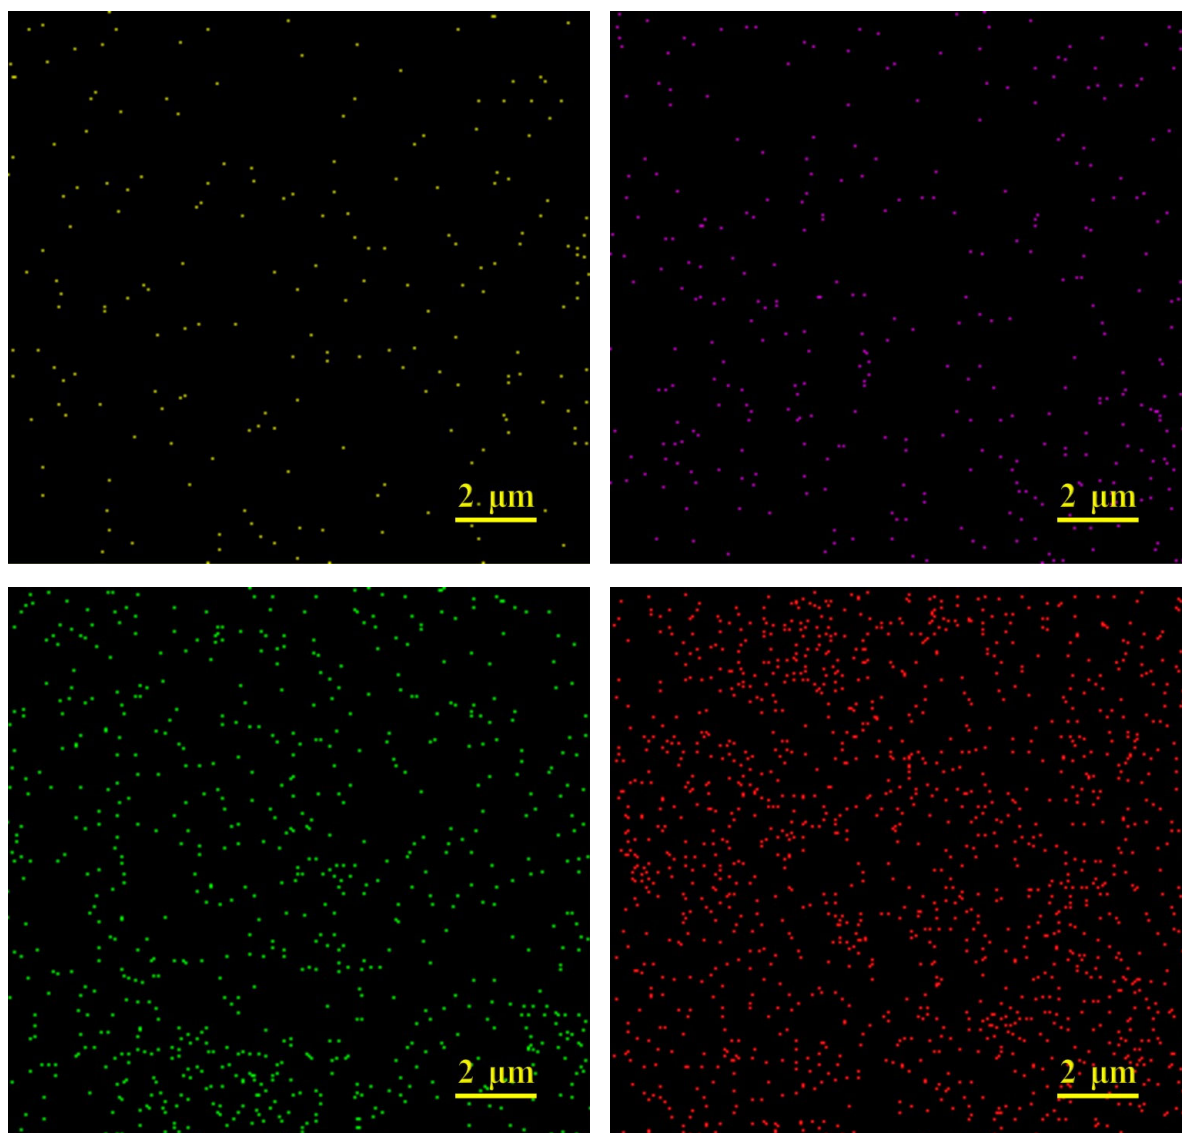

**Fig. S3.** EDS mapping (Zinc) of PSF-ZIF-95-8% loaded membrane (yellow), PSF-ZIF-95-16% loaded membrane (purple), PSF-ZIF-95-24% loaded membrane (green), and PSF-ZIF-95-32% loaded membrane (red).

### S5. DSC Data of Membranes:

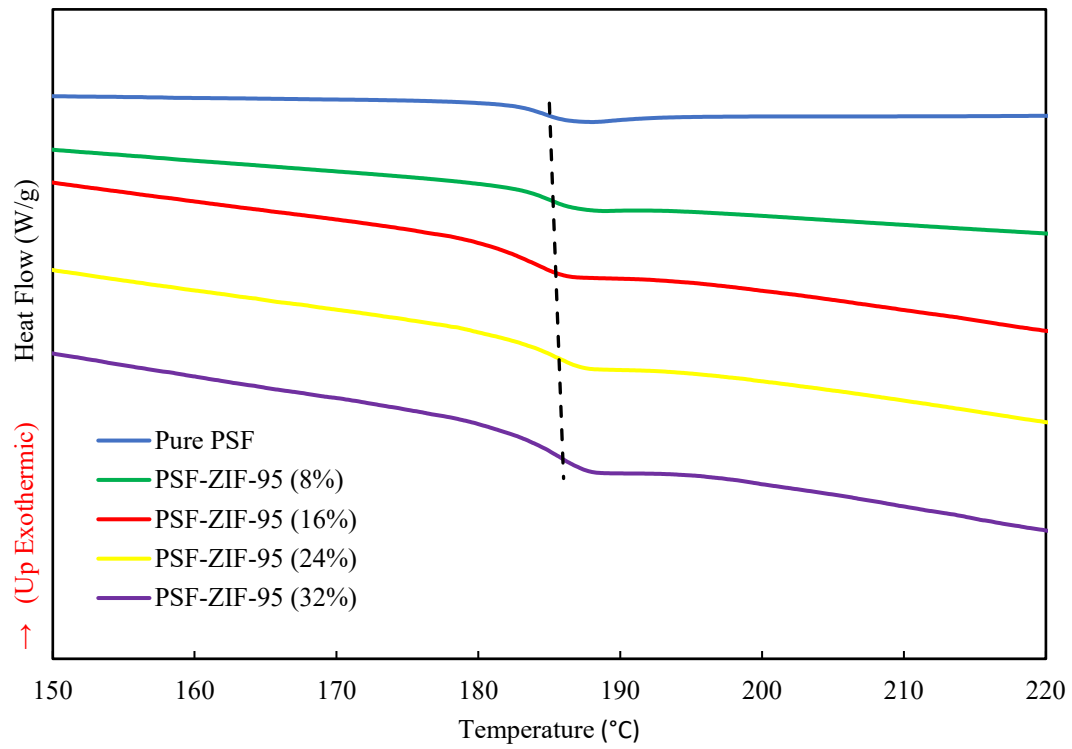

Fig. S4. DSC thermograms of pure and loaded mixed matrix membranes

## S6. Permeabilities & Selectivity:

**Note: In all the tables, permeabilities and permeances are provided Barrer and GPU units, respectively.**

**Table S1.** Permeability of synthesized membranes.

| MEMBRANE                | Permeability (Barrer) |          |        |                |          |         |
|-------------------------|-----------------------|----------|--------|----------------|----------|---------|
|                         | Helium                | Hydrogen | Oxygen | Carbon dioxide | Nitrogen | Methane |
| Polysulfone Pure        | 9.34                  | 9.60     | 0.91   | 4.88           | 0.160    | 0.160   |
| Polysufone-ZIF-95 (8%)  | 10.2                  | 11.28    | 1.03   | 5.50           | 0.160    | 0.160   |
| Polysufone-ZIF-95 (16%) | 12.04                 | 13.14    | 1.23   | 6.47           | 0.195    | 0.186   |
| Polysufone-ZIF-95 (24%) | 15.21                 | 17.30    | 1.62   | 8.16           | 0.256    | 0.250   |
| Polysufone-ZIF-95 (32%) | 17.68                 | 21.14    | 2.19   | 11.11          | 0.399    | 0.390   |

**Table S2.** Selectivity of synthesized membranes.

| MEMBRANE                 | Ideal Selectivity |                   |                    |                   |                    |                                |                                 |                                |                                 |                                 |                                  |                                |                                 |
|--------------------------|-------------------|-------------------|--------------------|-------------------|--------------------|--------------------------------|---------------------------------|--------------------------------|---------------------------------|---------------------------------|----------------------------------|--------------------------------|---------------------------------|
|                          | He/H <sub>2</sub> | He/O <sub>2</sub> | He/CO <sub>2</sub> | He/N <sub>2</sub> | He/CH <sub>4</sub> | H <sub>2</sub> /O <sub>2</sub> | H <sub>2</sub> /CO <sub>2</sub> | H <sub>2</sub> /N <sub>2</sub> | H <sub>2</sub> /CH <sub>4</sub> | CO <sub>2</sub> /N <sub>2</sub> | CO <sub>2</sub> /CH <sub>4</sub> | O <sub>2</sub> /N <sub>2</sub> | N <sub>2</sub> /CH <sub>4</sub> |
| Polysulfone Pure (0 %)   | 0.972             | 10.263            | 1.913              | 58.375            | 58.375             | 10.549                         | 1.967                           | 60.000                         | 60.000                          | 30.500                          | 30.500                           | 5.687                          | 1.000                           |
| Polysufone-ZIF-95 (8 %)  | 0.904             | 9.902             | 1.854              | 63.750            | 63.750             | 10.951                         | 2.050                           | 70.500                         | 70.500                          | 34.375                          | 34.375                           | 6.437                          | 1.000                           |
| Polysufone-ZIF-95 (16 %) | 0.916             | 9.788             | 1.860              | 61.743            | 64.731             | 10.682                         | 2.030                           | 67.384                         | 70.645                          | 33.179                          | 34.784                           | 6.307                          | 1.048                           |
| Polysufone-ZIF-95 (24 %) | 0.879             | 9.388             | 1.864              | 59.414            | 60.840             | 10.679                         | 2.120                           | 67.578                         | 69.200                          | 31.875                          | 32.640                           | 6.328                          | 1.024                           |
| Polysufone-ZIF-95 (32 %) | 0.836             | 8.073             | 1.5632             | 44.310            | 45.333             | 9.652                          | 1.902                           | 52.982                         | 54.205                          | 27.844                          | 28.487                           | 5.488                          | 1.023                           |

## S7. Diffusivity and Solubility

**Table S3.** Diffusivity coefficients (cm<sup>2</sup>/s) of Pure and loaded mixed matrix membranes.

| Membrane       | D_He                  | D_H <sub>2</sub>      | D_O <sub>2</sub>      | D_CO <sub>2</sub>     | D_N <sub>2</sub>      | D_CH <sub>4</sub>     |
|----------------|-----------------------|-----------------------|-----------------------|-----------------------|-----------------------|-----------------------|
| Pure PSF       | 1.08×10 <sup>-7</sup> | 5.6×10 <sup>-8</sup>  | 1.53×10 <sup>-8</sup> | 6.61×10 <sup>-9</sup> | 2.39×10 <sup>-9</sup> | 1.98×10 <sup>-9</sup> |
| PSF-ZIF-95-8%  | 1.46×10 <sup>-7</sup> | 1.09×10 <sup>-8</sup> | 1.80×10 <sup>-8</sup> | 7.78×10 <sup>-9</sup> | 2.89×10 <sup>-9</sup> | 1.95×10 <sup>-9</sup> |
| PSF-ZIF-95-16% | 2.05×10 <sup>-7</sup> | 2.29×10 <sup>-7</sup> | 2.25×10 <sup>-8</sup> | 1.13×10 <sup>-8</sup> | 4.43×10 <sup>-9</sup> | 2.07×10 <sup>-9</sup> |
| PSF-ZIF-95-24% | 3.17×10 <sup>-7</sup> | 3.70×10 <sup>-7</sup> | 2.93×10 <sup>-8</sup> | 1.41×10 <sup>-8</sup> | 6.27×10 <sup>-9</sup> | 2.41×10 <sup>-9</sup> |
| PSF-ZIF-95-32% | 4.01×10 <sup>-7</sup> | 5.77×10 <sup>-7</sup> | 3.94×10 <sup>-8</sup> | 2.15×10 <sup>-8</sup> | 9.8×10 <sup>-9</sup>  | 3.10×10 <sup>-9</sup> |

| MEMBRANE<br>Table S3 (continued) | Diffusivity Selectivity |                   |                    |                   |                    |                                |                                 |                                |                                 |                                 |                                  |                                |                                 |
|----------------------------------|-------------------------|-------------------|--------------------|-------------------|--------------------|--------------------------------|---------------------------------|--------------------------------|---------------------------------|---------------------------------|----------------------------------|--------------------------------|---------------------------------|
|                                  | He/H <sub>2</sub>       | He/O <sub>2</sub> | He/CO <sub>2</sub> | He/N <sub>2</sub> | He/CH <sub>4</sub> | H <sub>2</sub> /O <sub>2</sub> | H <sub>2</sub> /CO <sub>2</sub> | H <sub>2</sub> /N <sub>2</sub> | H <sub>2</sub> /CH <sub>4</sub> | CO <sub>2</sub> /N <sub>2</sub> | CO <sub>2</sub> /CH <sub>4</sub> | O <sub>2</sub> /N <sub>2</sub> | N <sub>2</sub> /CH <sub>4</sub> |
| Polysulfone Pure<br>(0 %)        | 1.926                   | 7.051             | 16.320             | 45.038            | 54.486             | 3.660                          | 8.472                           | 23.378                         | 28.283                          | 2.760                           | 3.339                            | 6.387                          | 1.210                           |
| Polysulfone-ZIF-95<br>(8 %)      | 1.338                   | 8.114             | 18.763             | 50.614            | 74.900             | 6.063                          | 14.021                          | 37.821                         | 55.968                          | 2.698                           | 3.992                            | 6.238                          | 1.480                           |
| Polysulfone-ZIF-95<br>(16 %)     | 0.892                   | 9.107             | 18.202             | 46.244            | 98.934             | 10.204                         | 20.395                          | 51.815                         | 110.853                         | 2.541                           | 5.435                            | 5.078                          | 2.139                           |
| Polysulfone-ZIF-95<br>(24 %)     | 0.857                   | 10.823            | 22.427             | 50.615            | 131.748            | 12.622                         | 26.155                          | 59.027                         | 153.646                         | 2.257                           | 5.874                            | 4.676                          | 2.603                           |
| Polysulfone-ZIF-95<br>(32 %)     | 0.695                   | 10.163            | 18.673             | 40.839            | 129.311            | 14.620                         | 26.862                          | 58.750                         | 186.022                         | 2.187                           | 6.925                            | 4.018                          | 3.166                           |

**Table S4.** Solubility coefficients [Unit = cm<sup>3</sup> (gas) cm<sup>-3</sup> (ZIF) cmHg ] of bare and loaded mixed matrix membrane.

| Membrane       | S_He                 | S_H <sub>2</sub>      | S_O <sub>2</sub>     | S_CO <sub>2</sub>    | S_N <sub>2</sub>      | S_CH <sub>4</sub>     |
|----------------|----------------------|-----------------------|----------------------|----------------------|-----------------------|-----------------------|
| Pure PSF       | 8.67×10 <sup>7</sup> | 1.74 ×10 <sup>8</sup> | 5.73×10 <sup>7</sup> | 7.36×10 <sup>8</sup> | 7.18×10 <sup>7</sup>  | 8.43×10 <sup>7</sup>  |
| PSF-ZIF-95-8%  | 7.05×10 <sup>7</sup> | 1.03×10 <sup>8</sup>  | 5.87×10 <sup>7</sup> | 7.10×10 <sup>8</sup> | 6.32 ×10 <sup>7</sup> | 8.67 ×10 <sup>7</sup> |
| PSF-ZIF-95-16% | 5.85×10 <sup>7</sup> | 5.63×10 <sup>7</sup>  | 5.32×10 <sup>7</sup> | 5.59×10 <sup>8</sup> | 5.56×10 <sup>7</sup>  | 9.38×10 <sup>7</sup>  |
| PSF-ZIF-95-24% | 4.79×10 <sup>7</sup> | 4.67×10 <sup>7</sup>  | 5.60×10 <sup>7</sup> | 5.75×10 <sup>8</sup> | 4.46×10 <sup>7</sup>  | 1.08×10 <sup>8</sup>  |
| PSF-ZIF-95-32% | 4.44×10 <sup>7</sup> | 3.64×10 <sup>7</sup>  | 5.36×10 <sup>7</sup> | 5.14×10 <sup>8</sup> | 4.04×10 <sup>7</sup>  | 1.10×10 <sup>8</sup>  |

| MEMBRANE<br>Table S4(Continued) | Solubility Selectivity |                   |                    |                   |                    |                                |                                 |                                |                                 |                                 |                                  |                                |                                 |
|---------------------------------|------------------------|-------------------|--------------------|-------------------|--------------------|--------------------------------|---------------------------------|--------------------------------|---------------------------------|---------------------------------|----------------------------------|--------------------------------|---------------------------------|
|                                 | He/H <sub>2</sub>      | He/O <sub>2</sub> | He/CO <sub>2</sub> | He/N <sub>2</sub> | He/CH <sub>4</sub> | H <sub>2</sub> /O <sub>2</sub> | H <sub>2</sub> /CO <sub>2</sub> | H <sub>2</sub> /N <sub>2</sub> | H <sub>2</sub> /CH <sub>4</sub> | CO <sub>2</sub> /N <sub>2</sub> | CO <sub>2</sub> /CH <sub>4</sub> | O <sub>2</sub> /N <sub>2</sub> | N <sub>2</sub> /CH <sub>4</sub> |
| Polysulfone Pure<br>(0 %)       | 0.498                  | 1.513             | 0.117              | 1.207             | 1.028              | 3.036                          | 0.236                           | 2.422                          | 2.064                           | 10.249                          | 8.732                            | 0.797                          | 0.852                           |
| Polysulfone-ZIF-95<br>(8 %)     | 0.681                  | 1.201             | 0.099              | 1.115             | 0.813              | 1.762                          | 0.145                           | 1.635                          | 1.193                           | 11.222                          | 8.184                            | 0.928                          | 0.729                           |
| Polysulfone-ZIF-95<br>(16 %)    | 1.038                  | 1.098             | 0.104              | 1.052             | 0.623              | 1.057                          | 0.100                           | 1.013                          | 0.600                           | 10.061                          | 5.959                            | 0.957                          | 0.592                           |
| Polysulfone-ZIF-95<br>(24 %)    | 1.025                  | 0.856             | 0.083              | 1.074             | 0.443              | 0.834                          | 0.081                           | 1.047                          | 0.432                           | 12.907                          | 5.322                            | 1.255                          | 0.412                           |
| Polysulfone-ZIF-95<br>(32 %)    | 1.220                  | 0.829             | 0.086              | 1.099             | 0.400              | 0.679                          | 0.070                           | 0.901                          | 0.327                           | 12.727                          | 4.631                            | 1.325                          | 0.363                           |



**S8. Literature of Mixed Matrix Membranes** (Reporting permeabilities except where permanence is mentioned)

**Table S5.** Literature review of MMMs reported for He, H<sub>2</sub>, O<sub>2</sub>, CO<sub>2</sub>, N<sub>2</sub>, and CH<sub>4</sub> gases separation.

| MEMBRANE                              | YEAR | Temperature  | Helium | Hydrogen             | Oxygen              | Carbon dioxide      | Nitrogen           | Methane            | Ref          |
|---------------------------------------|------|--------------|--------|----------------------|---------------------|---------------------|--------------------|--------------------|--------------|
| PSF                                   | 2006 | 35 C (4 Bar) | 8.02   |                      | 0.89                | 4.46                | 0.18               | 0.17               | <sup>1</sup> |
| PSF/MCM-48 (20%)                      |      |              | 32.1   |                      | 4.14                | 18.21               | 0.77               | 0.77               |              |
| Matrimid 5218                         | 2011 | 35 C (3 Bar) | 8.75   |                      | 1.29                | 4.3                 | 0.22               | 0.21               | <sup>2</sup> |
| Matrimid/TiO <sub>2</sub> (20 %)      |      |              | 19     |                      | 2.45                | 10.54               | 0.92               | 0.77               |              |
| Matrimid 5218                         | 2012 | 22 C (4 Bar) |        | 32.68                | 2.62                | 8.07                | 0.36               | 0.23               | <sup>3</sup> |
| Matrimid/ZIF-8 (20%)                  |      |              |        | 63.53                | 5.63                | 16.63               | 0.88               | 0.46               |              |
| PEI                                   | 2014 | 25 C (6 Bar) |        | 10.07                |                     | 1.68                | 0.1                | 0.09               | <sup>4</sup> |
| PEI/MOF-5 (25%)                       |      |              |        | 28.32                |                     | 5.39                | 0.19               | 0.23               |              |
| PIM-1                                 | 2016 | 25 C (5 Bar) | 1170   | 2710                 | 875                 | 4770                | 219                | 286                | <sup>5</sup> |
| PIM-1/UiO-66-NH <sub>2</sub> (16.6 %) |      |              | 1340   | 3130                 | 1090                | 6340                | 303                | 425                |              |
| PIM-1                                 | 2016 | 25 C (2 Bar) |        | 32.68                | 2.62                | 8.07                | 0.36               | 0.23               | <sup>6</sup> |
| PIM/Mg-MOF-74 (20 %)                  |      |              |        | 63.53                | 5.63                | 16.63               | 0.88               | 0.46               |              |
| PEI                                   | 2017 | 35 C (2 Bar) |        | 856                  | 119.9               | 82.5                | 21.8               | 18.9               | <sup>7</sup> |
| PEI/nZIF-7-PSM (5%)                   |      |              |        | 2020                 | 272.9               | 245.9               | 182.6              | 107.9              |              |
| Akram PI spongy                       | 2019 | 35 C (2 Bar) |        | 128.7<br>(Permeance) | 16.8<br>(Permeance) | 69.1<br>(Permeance) | 4.3<br>(Permeance) | 4.1<br>(Permeance) | <sup>8</sup> |
| Akram PI/ZIF-302 (5%)                 |      |              |        | 156.4<br>(Permeance) | 14.1<br>(Permeance) | 62<br>(Permeance)   | 2.5<br>(Permeance) | 3.7<br>(Permeance) |              |

| Table S5 Continued                    | Ideal Selectivity |                   |                    |                   |                    |                                |                                 |                                |                                 |                                 |                                  |                                |                                 |
|---------------------------------------|-------------------|-------------------|--------------------|-------------------|--------------------|--------------------------------|---------------------------------|--------------------------------|---------------------------------|---------------------------------|----------------------------------|--------------------------------|---------------------------------|
| Membrane                              | He/H <sub>2</sub> | He/O <sub>2</sub> | He/CO <sub>2</sub> | He/N <sub>2</sub> | He/CH <sub>4</sub> | H <sub>2</sub> /O <sub>2</sub> | H <sub>2</sub> /CO <sub>2</sub> | H <sub>2</sub> /N <sub>2</sub> | H <sub>2</sub> /CH <sub>4</sub> | CO <sub>2</sub> /N <sub>2</sub> | CO <sub>2</sub> /CH <sub>4</sub> | O <sub>2</sub> /N <sub>2</sub> | N <sub>2</sub> /CH <sub>4</sub> |
| PSF                                   |                   | 8.183             | 1.798              | 44.555            | 47.176             |                                |                                 |                                |                                 | 24.777                          | 26.235                           | 5.444                          | 1.058                           |
| PSF/MCM-48 (20%)                      |                   | 7.753             | 1.762              | 41.688            | 41.688             |                                |                                 |                                |                                 | 23.649                          | 23.649                           | 5.376                          | 1.000                           |
| Matrimid 5218                         |                   | 6.782             | 2.034              | 39.772            | 41.666             |                                |                                 |                                |                                 | 19.545                          | 20.476                           | 5.863                          | 1.047                           |
| Matrimid/TiO <sub>2</sub> (20 %)      |                   | 7.755             | 1.802              | 20.652            | 24.675             |                                |                                 |                                |                                 | 11.456                          | 13.688                           | 2.663                          | 1.194                           |
| Matrimid 5218                         |                   |                   |                    |                   |                    | 12.473                         | 4.049                           | 90.777                         | 142.087                         | 22.416                          | 35.087                           | 7.277                          | 1.565                           |
| Matrimid/ZIF-8 (20%)                  |                   |                   |                    |                   |                    | 11.284                         | 3.820                           | 72.193                         | 138.108                         | 18.897                          | 36.152                           | 6.397                          | 1.913                           |
| PEI                                   |                   |                   |                    |                   |                    |                                | 5.994                           | 100.700                        | 111.888                         | 16.800                          | 18.666                           |                                | 1.111                           |
| PEI/MOF-5 (25%)                       |                   |                   |                    |                   |                    |                                | 5.254                           | 149.052                        | 123.130                         | 28.368                          | 23.434                           |                                | 0.826                           |
| PIM-1                                 | 0.431             | 1.337             | 0.245              | 5.342             | 4.090              | 3.097                          | 0.568                           | 12.374                         | 9.475                           | 21.780                          | 16.678                           | 3.995                          | 0.765                           |
| PIM-1/UiO-66-NH <sub>2</sub> (16.6 %) | 0.428             | 1.229             | 0.211              | 4.422             | 3.152              | 2.871                          | 0.493                           | 10.330                         | 7.364                           | 20.924                          | 14.917                           | 3.597                          | 0.712                           |
| PIM-1                                 |                   |                   |                    |                   |                    | 3.299                          | 0.537                           | 10.076                         | 6.598                           | 18.73                           | 12.268                           | 3.054                          | 0.654                           |
| PIM/Mg-MOF-74 (20 %)                  |                   |                   |                    |                   |                    | 5.095                          | 0.539                           | 15.456                         | 10.295                          | 28.664                          | 19.092                           | 3.033                          | 0.666                           |
| PEI                                   |                   |                   |                    |                   |                    | 7.139                          | 10.375                          | 39.266                         | 45.291                          | 3.784                           | 4.365                            | 5.500                          | 1.153                           |
| PEI/nZIF-7-PSM (5%)                   |                   |                   |                    |                   |                    | 7.405                          | 8.218                           | 11.067                         | 18.729                          | 1.346                           | 2.279                            | 1.494                          | 1.692                           |
| PI                                    |                   |                   |                    |                   |                    | 7.660                          | 1.862                           | 29.930                         | 31.390                          | 16.069                          | 16.853                           | 3.907                          | 1.048                           |
| PI/ZIF-302 (5%)                       |                   |                   |                    |                   |                    | 11.092                         | 2.522                           | 62.560                         | 42.270                          | 24.800                          | 16.756                           | 5.640                          | 0.675                           |

**Table S6.** Literature review of MMMs reported for O<sub>2</sub>, CO<sub>2</sub>, N<sub>2</sub>, and CH<sub>4</sub> gases separation.

| MEMBRANE                          | YEAR | Temperature   | Oxygen | Carbon dioxide      | Nitrogen            | Methane             | CO <sub>2</sub> /N <sub>2</sub> | CO <sub>2</sub> /CH <sub>4</sub> | O <sub>2</sub> /N <sub>2</sub> | N <sub>2</sub> /CH <sub>4</sub> | Ref.          |
|-----------------------------------|------|---------------|--------|---------------------|---------------------|---------------------|---------------------------------|----------------------------------|--------------------------------|---------------------------------|---------------|
| PSF                               | 1996 | 35 C (10 Bar) | 1.29   | 5.5                 | 0.22                | 0.24                | 25.000                          | 22.916                           | 5.863                          | 0.916                           | <sup>9</sup>  |
| PSF-HN <sub>2</sub> -16%          |      |               | 0.69   | 2.7                 | 0.11                | 0.11                | 24.545                          | 24.545                           | 6.272                          | 1.000                           |               |
| PSF                               | 2001 | 35 C (3 Bar)  | 1.5    | 7.53                | 0.257               | 0.389               | 29.299                          | 19.357                           | 5.836                          | 0.660                           | <sup>10</sup> |
| PSF/MCM-41 (30%)                  |      |               | 3.83   | 20.5                | 0.753               | 1.05                | 27.224                          | 19.523                           | 5.086                          | 0.717                           |               |
| PSF                               | 2011 | 25 C (4 Bar)  | 2.75   | 16                  | 0.47                | 0.45                | 34.042                          | 35.555                           | 5.851                          | 1.044                           | <sup>11</sup> |
| PSF/MCM41-APTMS-Modified (20 %)   |      |               | 4.04   | 23                  | 0.52                | 0.52                | 44.230                          | 44.230                           | 7.769                          | 1.000                           |               |
| PSF                               | 2011 | 35 C (3.5Bar) | 1.107  | 2                   | 0.402               | 0.484               | 4.975                           | 4.125                            | 2.753                          | 0.829                           | <sup>12</sup> |
| PI                                |      |               | 0.727  | 1.595               | 0.2403              | 0.361               | 6.641                           | 4.413                            | 3.027                          | 0.664                           |               |
| PSF-PI/ZSM-5 (20%)                |      |               | 0.876  | 1.528               | 0.2943              | 0.349               | 5.194                           | 4.379                            | 2.978                          | 0.843                           |               |
| PSF                               | 2012 | 30 C (3 Bar)  | 1.47   |                     | 0.25                |                     |                                 |                                  | 5.88                           |                                 | <sup>13</sup> |
| PSF/MIL-101(Cr) (8%)              |      |               | 2.53   |                     | 0.47                |                     |                                 |                                  | 5.383                          |                                 |               |
| PSF/MIL-101(Fe) (8%)              |      |               | 2.03   |                     | 0.35                |                     |                                 |                                  | 5.80                           |                                 |               |
| PSF                               | 2016 | 35 C (3 Bar)  |        | 5.6                 | 0.19                | 0.21                |                                 |                                  |                                |                                 | <sup>14</sup> |
| PSF/NH <sub>2</sub> -UiO-66 (50%) |      |               |        | 43                  | 1.65                | 1.8                 |                                 |                                  |                                |                                 |               |
| PSF                               | 2017 | 35 C (3 Bar)  |        | 5.6<br>(Permeance)  | 0.91<br>(Permeance) | 1.73<br>(Permeance) | 6.153                           | 3.237                            |                                |                                 | <sup>15</sup> |
| PSF/SAPO-34-IL6 (5%)              |      |               |        | 7.24<br>(Permeance) | 0.38<br>(Permeance) | 0.36<br>(Permeance) | 19.052                          | 20.111                           |                                |                                 |               |

| <b>Table S6 Continued</b>               | <b>Year</b> | <b>Temperature</b> | <b>Oxygen</b> | <b>Carbon</b> | <b>Nitrogen</b> | <b>Methane</b> | <b>CO<sub>2</sub>/N<sub>2</sub></b> | <b>CO<sub>2</sub>/CH<sub>4</sub></b> | <b>O<sub>2</sub>/N<sub>2</sub></b> | <b>N<sub>2</sub>/CH<sub>4</sub></b> | <b>Ref.</b>   |
|-----------------------------------------|-------------|--------------------|---------------|---------------|-----------------|----------------|-------------------------------------|--------------------------------------|------------------------------------|-------------------------------------|---------------|
|                                         |             |                    |               |               |                 |                |                                     |                                      |                                    |                                     |               |
| <b>PSF</b>                              | 2011        | 35 C (2.75 Bar)    | 1.6           |               | 0.28            |                |                                     |                                      | 5.7143                             |                                     | <sup>16</sup> |
| <b>PSF/ZIF-8 (16%)</b>                  |             |                    | 2.6           |               | 0.31            |                |                                     |                                      | 8.3871                             |                                     |               |
| <b>PES/MWCNT(Purified) (1%)</b>         | 2011        | 27 C (3 Bar)       | 2.319         | 7.742         | 0.91            | 0.396          | 8.507                               | 19.550                               | 2.5484                             | 2.2980                              | <sup>17</sup> |
| <b>PES/MWCNT (Aptes Modified 1%)</b>    |             |                    | 3.178         | 2.794         | 0.511           | 0.09           | 5.467                               | 31.044                               | 6.2192                             | 5.6778                              |               |
| <b>PSF</b>                              | 2019        | 25 C (10 Bar)      |               | 6.18          | 0.21            | 0.22           | 29.428                              | 28.090                               |                                    | 0.9545                              | <sup>18</sup> |
| <b>PSF/Bio-MOF-1 (30%)</b>              |             |                    |               | 16.57         | 0.36            | 0.39           | 46.027                              | 42.487                               |                                    | 0.9231                              |               |
| <b>PI</b>                               | 2018        | 25 C (1 Bar)       | 27.8          | 125.4         | 5.49            | 3.12           | 22.841                              | 40.192                               | 5.0638                             | 1.7596                              | <sup>19</sup> |
| <b>PI/ZIF-L (20%)</b>                   |             |                    | 30.9          | 19.4          | 6.29            | 4.23           | 3.084                               | 4.586                                | 4.9126                             | 1.4870                              |               |
| <b>Matrimid 5218</b>                    | 2015        | 35 C (10 Bar)      |               | 4.44          | 0.131           | 0.126          | 33.893                              | 35.238                               |                                    | 1.0397                              | <sup>20</sup> |
| <b>Matrimid /MIL-101(Cr) (10 %)</b>     |             |                    |               | 6.95          | 0.12            | 0.12           | 57.916                              | 57.916                               |                                    | 1.0000                              |               |
| <b>6FDA-DAM</b>                         | 2018        | 24 C (4 Bar)       |               | 770           | 32.08           |                | 24.00                               |                                      |                                    |                                     | <sup>21</sup> |
| <b>6FDA-DAM/ ZIF-94 (40%)</b>           |             |                    |               | 2310          | 105             |                | 22.00                               |                                      |                                    |                                     |               |
| <b>PEBAX</b>                            | 2017        | 0 C (1 Bar)        |               | 53.7          | 1.79            | 3.00           | 30.00                               | 17.900                               |                                    | 0.5967                              | <sup>22</sup> |
| <b>PEBAX/ ZIF-8 (15%) IL-(80%)</b>      |             |                    |               | 231.4         | 8.57            | 19.6           | 27.001                              | 11.806                               |                                    | 0.4372                              |               |
| <b>Matrimid-PBI (3:1)</b>               | 2021        | 22 C (10 Bar)      | 1.6           | 8.0           | 0.24            |                | 33.00                               |                                      |                                    |                                     | <sup>23</sup> |
| <b>Matrimid-PBI (3:1)/ZIF-95X (20%)</b> |             |                    | 0.78          | 3.1           | 0.16            |                | 19.38                               |                                      |                                    |                                     |               |

**Table S7.** Literature review of MMMs reported for CO<sub>2</sub>, N<sub>2</sub>, and CH<sub>4</sub> gases separation.

| MEMBRANE                     | YEAR | Temperature     | Carbon dioxide | Nitrogen | Methane | CO <sub>2</sub> /N <sub>2</sub> | CO <sub>2</sub> /CH <sub>4</sub> | N <sub>2</sub> /CH <sub>4</sub> | Ref. |
|------------------------------|------|-----------------|----------------|----------|---------|---------------------------------|----------------------------------|---------------------------------|------|
| PSF                          | 2011 | 35 C (2.75 Bar) | 5.95           | 0.24     |         | 24.791                          |                                  |                                 | 16   |
| PSF/Silicate-1-HKUST-(16%)   |      |                 | 8.9            | 0.22     |         | 40.454                          |                                  |                                 |      |
| PSF                          | 2011 | 35 C (2.75 Bar) | 4.6            |          | 0.19    |                                 | 24.210                           |                                 | 16   |
| PSF/Silicate-1-HKUST-(16%)   |      |                 | 8.9            |          | 0.39    |                                 | 22.820                           |                                 |      |
| PSF                          | 2016 | 35 C (2 Bar)    | 4.7            |          | 0.21    |                                 | 22.38                            |                                 | 24   |
| PSF/ MIL-101(Cr)-ZIF-8 (16%) |      |                 | 14.2           |          | 0.35    |                                 | 40.57                            |                                 |      |
| PSF                          | 2016 | 25 C (2 Bar)    | 6.32           | 0.24     |         | 26.333                          |                                  |                                 | 25   |
| PSF/ZIF-301 (30%)            |      |                 | 17.12          | 0.62     |         | 27.612                          |                                  |                                 |      |
| PSF                          | 2016 | 25 C (2 Bar)    | 6.32           | 0.24     |         | 26.333                          |                                  |                                 | 26   |
| PSF/GO-ZIF-301 (1%) (30%)    |      |                 | 25             | 0.4      |         | 62.500                          |                                  |                                 |      |
| PSF                          | 2016 | 25 C (2 Bar)    | 6.32           | 0.24     |         | 26.333                          |                                  |                                 | 27   |
| PSFZIF-302-CNT-(12%) (8%)    |      |                 | 18             | 0.514    |         | 35.019                          |                                  |                                 |      |
| PSF                          | 2016 | 25 C (2 Bar)    | 6.32           | 0.24     |         | 26.333                          |                                  |                                 | 28   |
| PSF/ZIF-302-GO (30%) (1%)    |      |                 | 13.21          | 0.26     |         | 50.807                          |                                  |                                 |      |
| PSF                          | 2020 | 25 C (3 Bar)    | 10.75          |          | 0.354   |                                 | 30.367                           |                                 | 29   |
| PSF/ ZIF-11 (24%)            |      |                 | 22.14          |          | 0.519   |                                 | 42.659                           |                                 |      |

**Table S8.** Literature review of MMMs reported for H<sub>2</sub>, CO<sub>2</sub>, N<sub>2</sub>, and CH<sub>4</sub> gases separation.

| MEMBRANE                                                                | YEA<br>R | Temperature       | Hydrogen             | Carbon<br>dioxide   | Methane | H <sub>2</sub> /CO <sub>2</sub> | H <sub>2</sub> /CH <sub>4</sub>            | Ref.          |
|-------------------------------------------------------------------------|----------|-------------------|----------------------|---------------------|---------|---------------------------------|--------------------------------------------|---------------|
| PSF-acrylate                                                            | 2010     | 25 C (12 Bar)     | 12.7<br>(Permeance)  | 8.19<br>(Permeance) |         | 1.550                           |                                            | <sup>30</sup> |
| PSF/ APTMS-<br>Zeolite-3A (30%)                                         |          |                   | 14.78<br>(Permeance) | 5.53<br>(Permeance) |         | 2.672                           |                                            |               |
| PSF                                                                     | 2011     | 35C (2.75<br>Bar) | 11                   |                     | 0.19    |                                 | 57.89                                      | <sup>16</sup> |
| PSF/ ZIF-8-(16%)                                                        |          |                   | 39.8                 |                     | 0.34    |                                 | 117.05                                     |               |
| PSF                                                                     | 2013     | 35 C (3 Bar)      | 8.2                  | 3                   | 0.27    | 2.733                           | 30.37                                      | <sup>31</sup> |
| PSF/SiO <sub>2</sub> -silanol<br>modified (25%)                         |          |                   | 25                   | 10.2                | 1.126   | 2.451                           | 22.05                                      |               |
| PMP                                                                     | 2014     | 30 C (2 Bar)      | 11.14                | 98.74               |         | 0.112                           |                                            | <sup>32</sup> |
| PMP/ MIL-53(Al)<br>(30%)                                                |          |                   | 13.11                | 217.65              |         | 0.060                           |                                            |               |
| PBI                                                                     | 2015     | 35 C (10 Bar)     | 3.62                 | 0.4                 |         | 9.05                            |                                            | <sup>33</sup> |
| PBI/[Cu <sub>2</sub> (ndc) <sub>2</sub> (d<br>abco)] <sub>n</sub> (20%) |          |                   | 6.14                 | 0.39                |         | 15.743                          |                                            |               |
| PBI                                                                     | 2016     | 150 C (5 Bar)     | 30                   | 7.89                |         | 3.802                           |                                            | <sup>34</sup> |
| PBI/ ZIF-8(10 %)                                                        |          |                   | 40                   | 8.89                |         | 4.499                           |                                            |               |
| Matrimid 5218                                                           | 2018     | 35 C (7 Bar)      |                      | 7.33                | 0.21    |                                 | CO <sub>2</sub> /CH <sub>4</sub><br>34.904 | <sup>35</sup> |
| PI-PVDF/ MIL-<br>101 (Cr) (10%)                                         |          |                   |                      | 14.87               | 0.24    |                                 | CO <sub>2</sub> /CH <sub>4</sub><br>61.958 |               |
| Matrimid                                                                | 2021     | 35 C (7 Bar)      | 22.30                | 5.70                | 0.17    |                                 | 131.18                                     | <sup>36</sup> |
| Matrimid/ZIF-95<br>(30%)                                                |          |                   | 76.60                | 23.20               | 0.40    |                                 | 191.50                                     |               |

### S9. Upper Bounds:

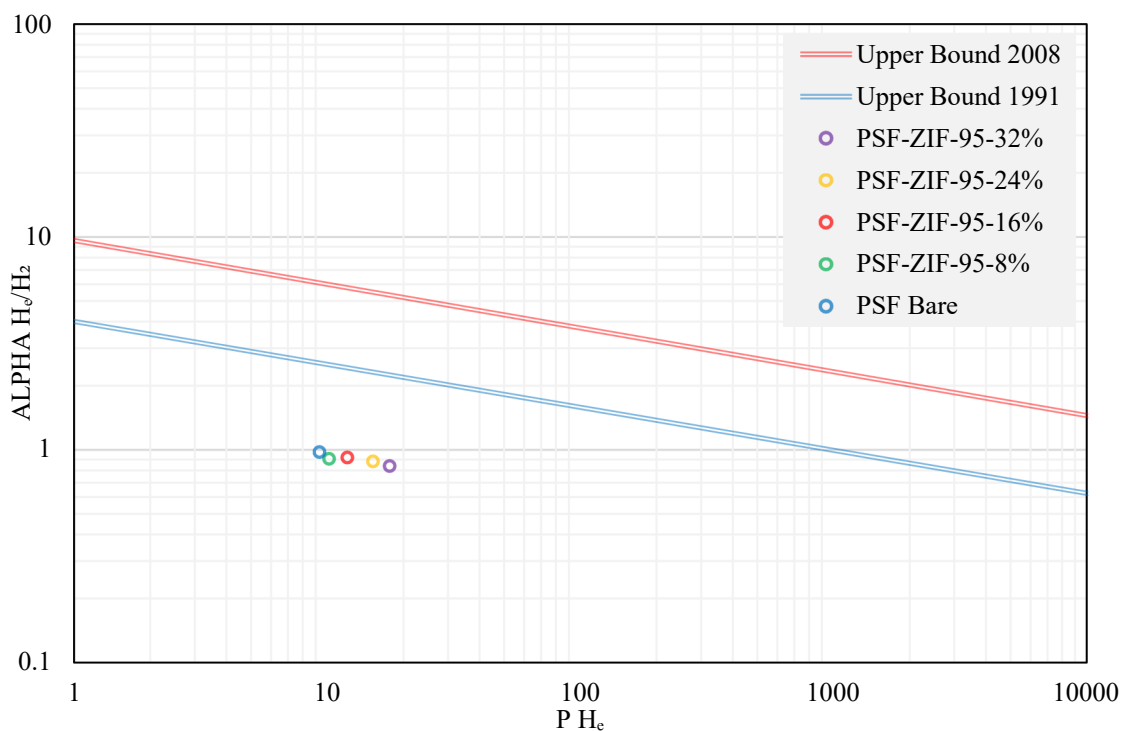

Fig. S5. He/H<sub>2</sub> selectivity vs He permeability of pure membrane (blue), 8% loaded membrane (green), 16% loaded membrane (red), 24% loaded membrane (yellow), and 32% loaded membrane (purple).

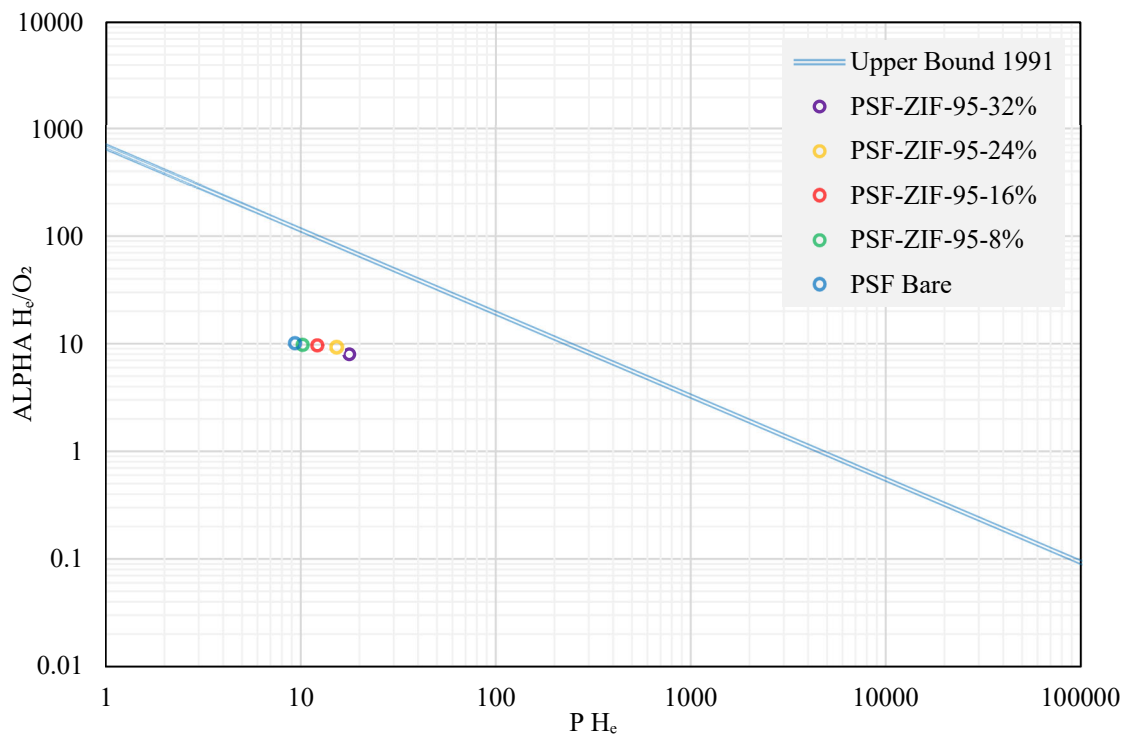

Fig. S6. He/O<sub>2</sub> selectivity vs He permeability of pure membrane (blue), 8% loaded membrane (green), 16% loaded membrane (red), 24% loaded membrane (yellow), and 32% loaded membrane (purple).

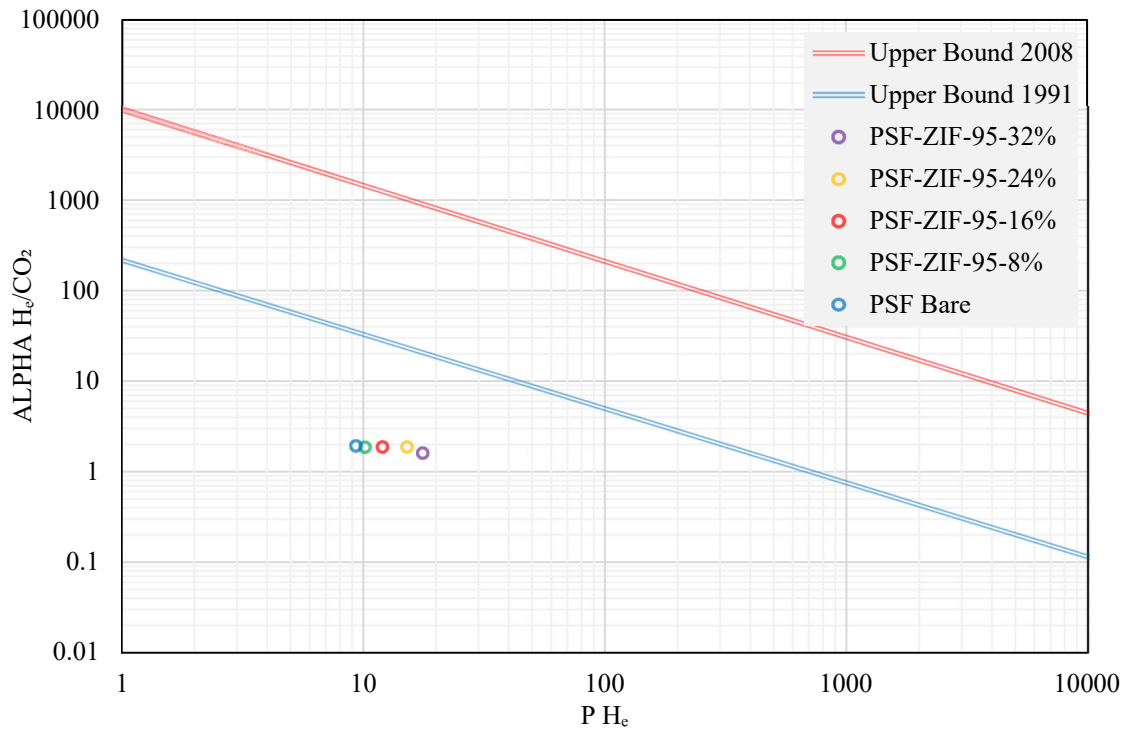

Fig. S7. He/CO<sub>2</sub> selectivity vs He permeability of pure membrane (blue), 8% loaded membrane (green), 16% loaded membrane (red), 24% loaded membrane (yellow), and 32% loaded membrane (purple).

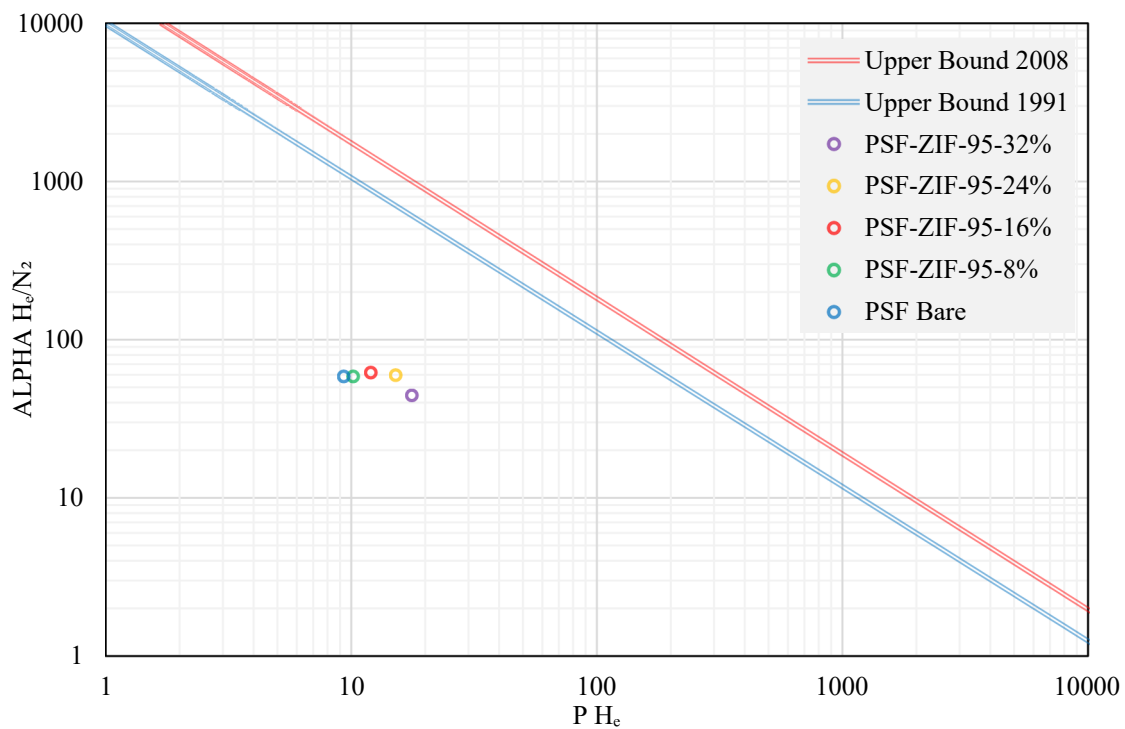

Fig. S8. He/N<sub>2</sub> selectivity vs He permeability of pure membrane (blue), 8% loaded membrane (green), 16% loaded membrane (red), 24% loaded membrane (yellow), and 32% loaded membrane (purple).



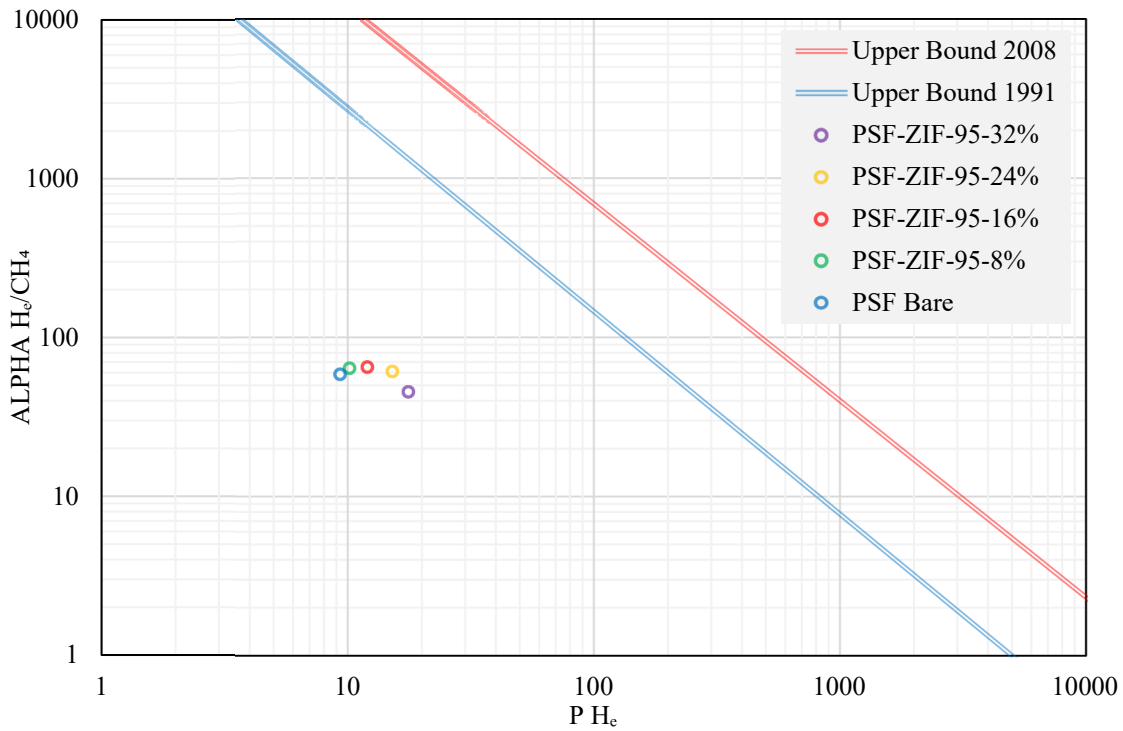

**Fig. S9.** He/CH<sub>4</sub> selectivity vs He permeability of pure membrane (blue), 8% loaded membrane (green), 16% loaded membrane (red), 24% loaded membrane (yellow), and 32% loaded membrane (purple).

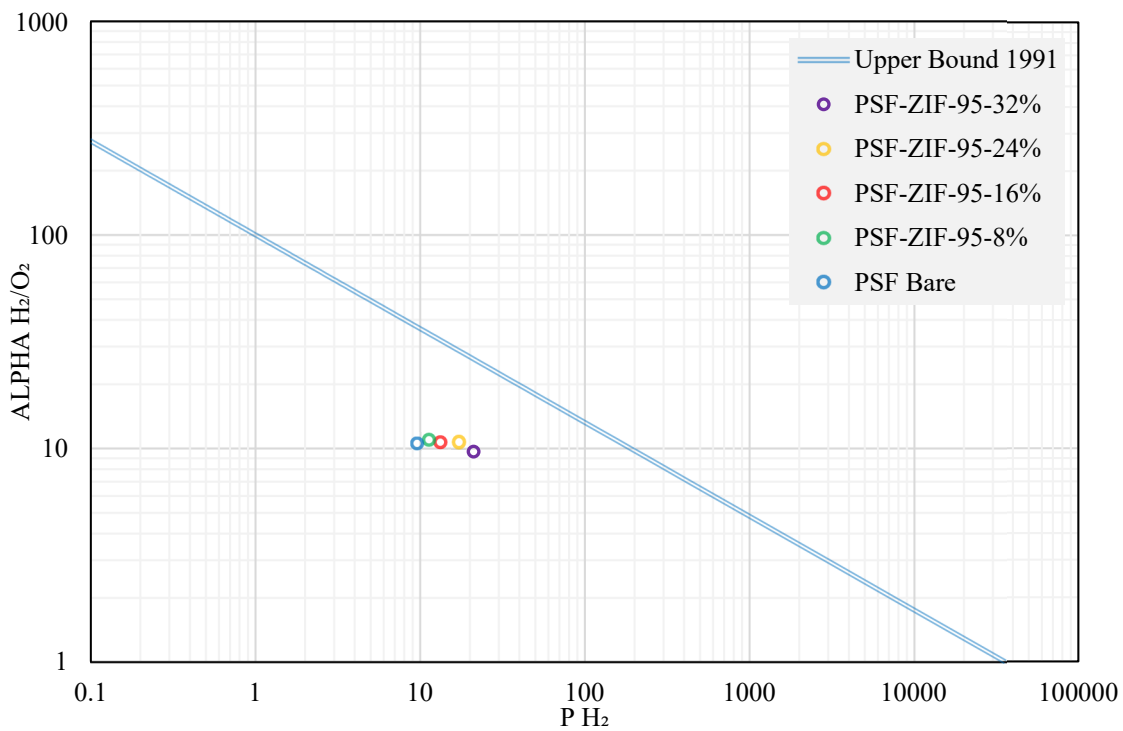

**Fig. S10.** H<sub>2</sub>/O<sub>2</sub> selectivity vs H<sub>2</sub> permeability of pure membrane (blue), 8% loaded membrane (green), 16% loaded membrane (red), 24% loaded membrane (yellow), and 32% loaded membrane (purple).

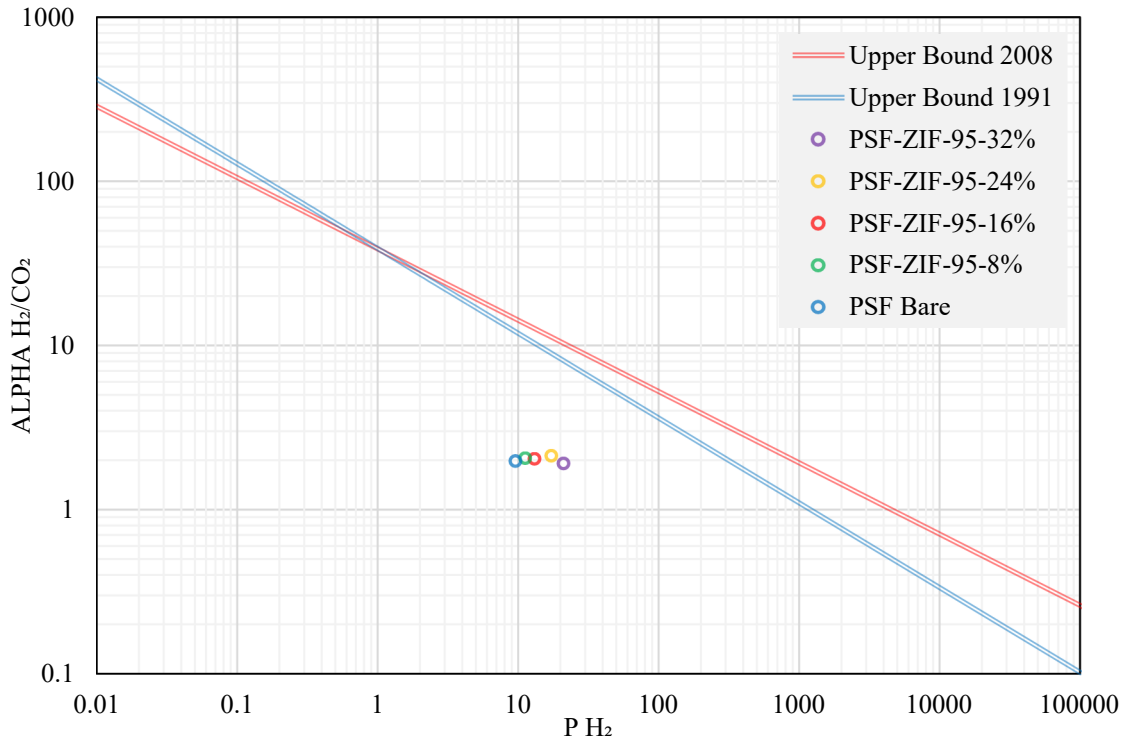

**Fig. S11.**  $H_2/CO_2$  selectivity vs  $H_2$  permeability of pure membrane (blue), 8% loaded membrane (green), 16% loaded membrane (red), 24% loaded membrane (yellow), and 32% loaded membrane (purple).

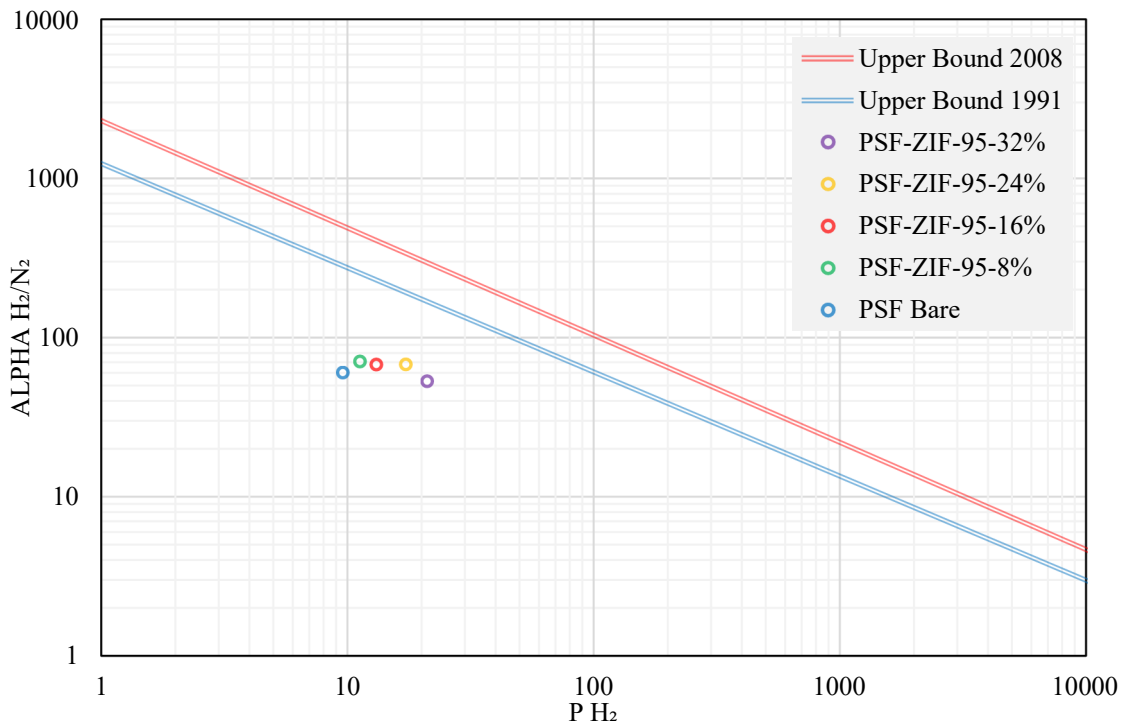

**Fig. S12.**  $H_2/N_2$  selectivity vs  $H_2$  permeability of pure membrane (blue), 8% loaded membrane (green), 16% loaded membrane (red), 24% loaded membrane (yellow), and 32% loaded membrane (purple).

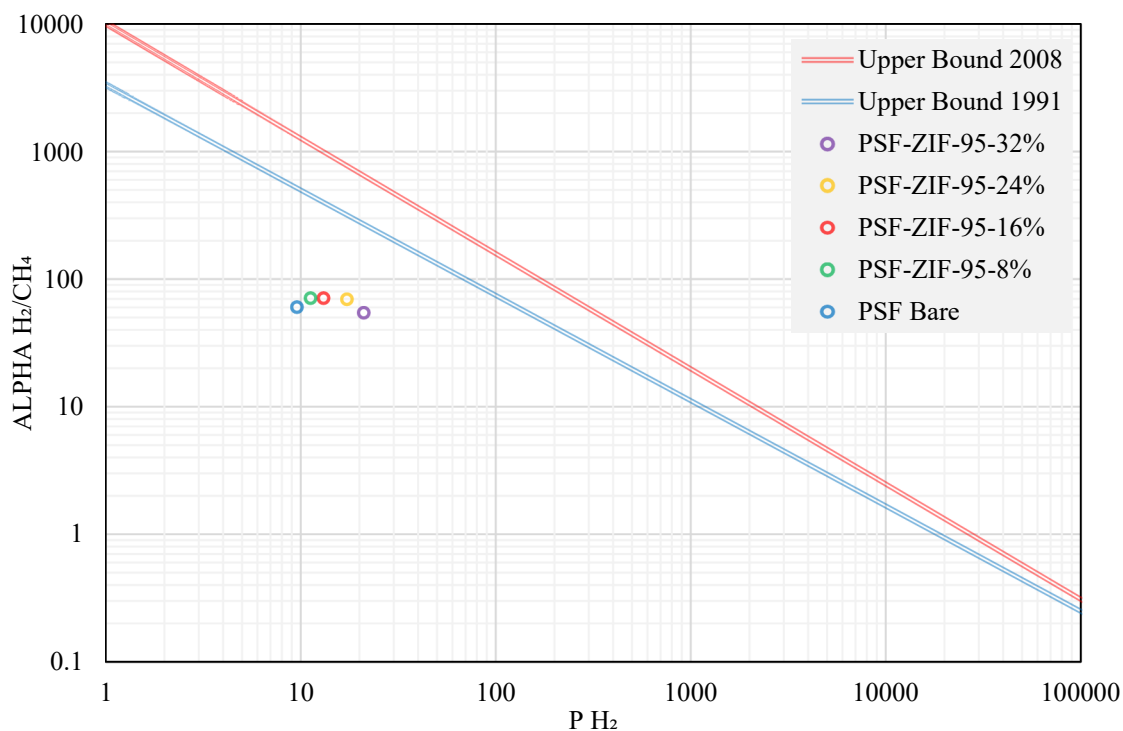

**Fig. S13.** H<sub>2</sub>/CH<sub>4</sub> selectivity vs H<sub>2</sub> permeability of pure membrane (blue), 8% loaded membrane (green), 16% loaded membrane (red), 24% loaded membrane (yellow), and 32% loaded membrane (purple).

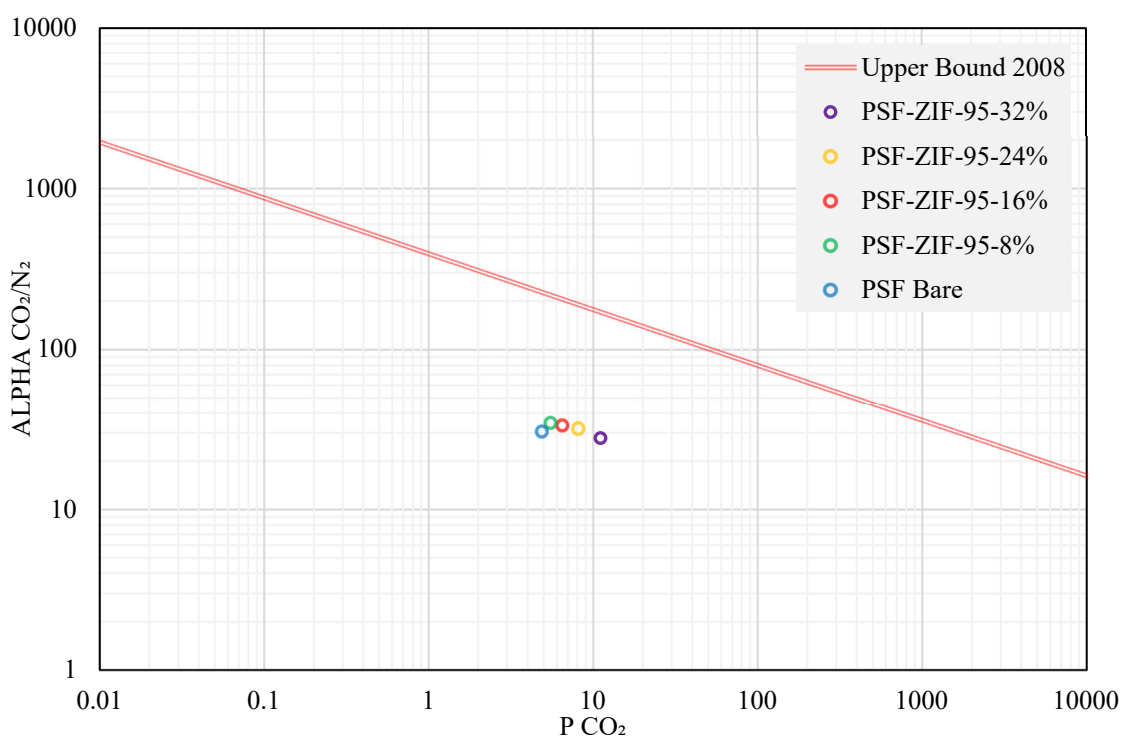

**Fig. S14.** CO<sub>2</sub>/N<sub>2</sub> selectivity vs CO<sub>2</sub> permeability of pure membrane (blue), 8% loaded membrane (green), 16% loaded membrane (red), 24% loaded membrane (yellow), and 32% loaded membrane (purple).

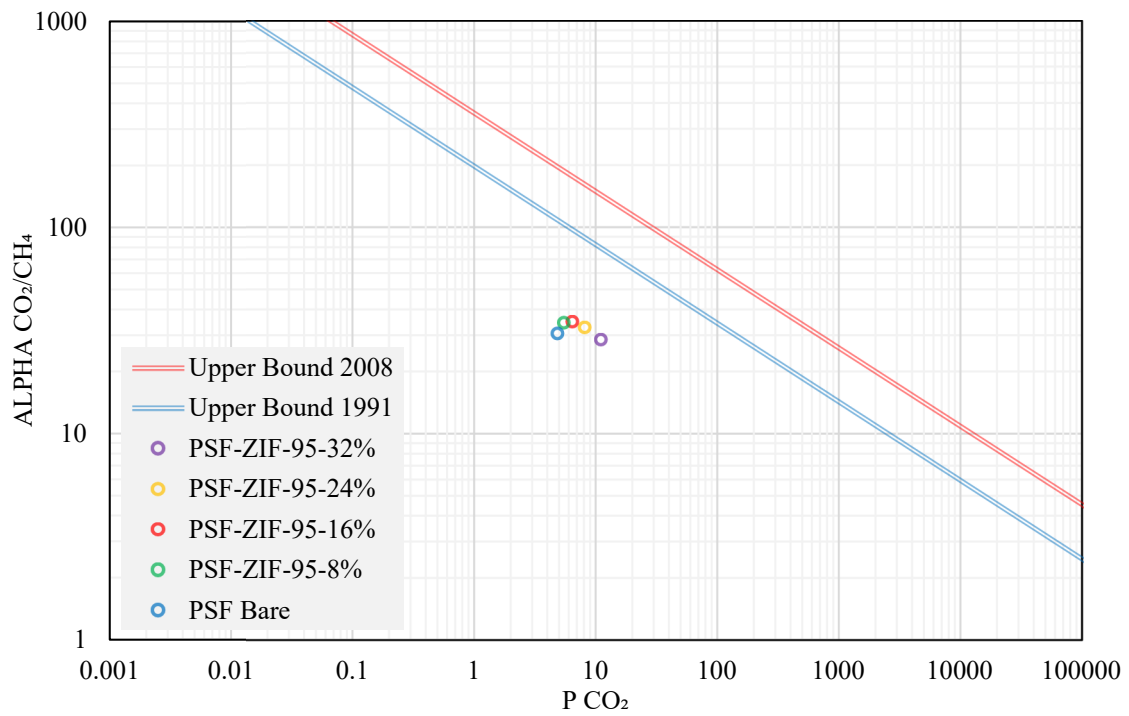

**Fig. S15.** CO<sub>2</sub>/CH<sub>4</sub> selectivity vs CO<sub>2</sub> permeability of pure membrane (blue), 8% loaded membrane (green), 16% loaded membrane (red), 24% loaded membrane (yellow), and 32% loaded membrane (purple).

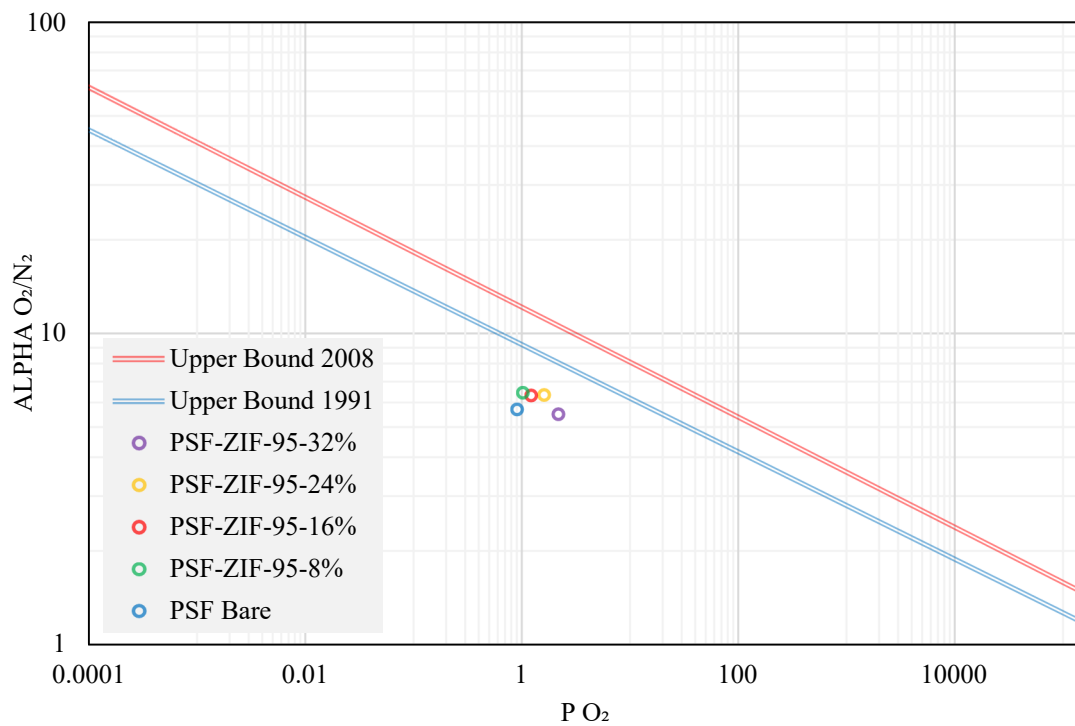

**Fig. S16.** O<sub>2</sub>/N<sub>2</sub> selectivity vs O<sub>2</sub> permeability of Pure membrane (blue), 8% loaded membrane (green), 16% loaded membrane (red), 24% loaded membrane (yellow), and 32% loaded membrane (purple).

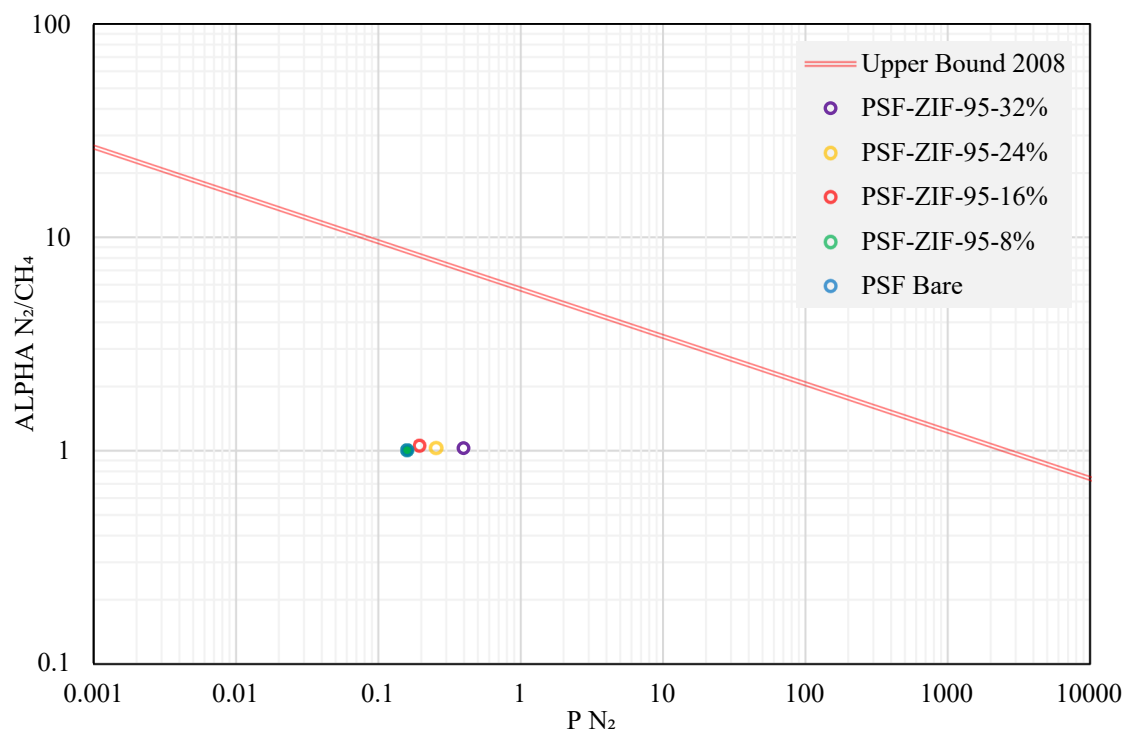

**Fig. S17.**  $N_2/CH_4$  selectivity vs  $N_2$  permeability of pure membrane (blue), 8% loaded membrane (green), 16% loaded membrane (red), 24% loaded membrane (yellow), and 32% loaded membrane (purple).

## References

1. S. Kim, E. Marand, J. Ida and V. V. Guliyants, *Chemistry of Materials*, 2006, **18**, 1149-1155.
2. F. Dorosti, M. R. Omidkhah, M. Z. Pedram and F. Moghadam, *Chemical Engineering Journal*, 2011, **171**, 1469-1476.
3. Q. Song, S. K. Nataraj, M. V. Roussenova, J. C. Tan, D. J. Hughes, W. Li, P. Bourgoin, M. A. Alam, A. K. Cheetham, S. A. Al-Muhtaseb and E. Sivaniah, *Energy & Environmental Science*, 2012, **5**, 8359-8369.
4. M. Arjmandi and M. Pakizeh, *Journal of Industrial and Engineering Chemistry*, 2014, **20**, 3857-3868.
5. M. R. Khdhayyer, E. Esposito, A. Fuoco, M. Monteleone, L. Giorno, J. C. Jansen, M. P. Attfield and P. M. Budd, *Separation and Purification Technology*, 2017, **173**, 304-313.
6. N. Tien-Binh, H. Vinh-Thang, X. Y. Chen, D. Rodrigue and S. Kaliaguine, *Journal of Membrane Science*, 2016, **520**, 941-950.
7. B. A. Al-Maythalony, A. M. Alloush, M. Faizan, H. Dafallah, M. A. A. Elgzoly, A. A. A. Seliman, A. Al-Ahmed, Z. H. Yamani, M. A. M. Habib, K. E. Cordova and O. M. Yaghi, *ACS Applied Materials & Interfaces*, 2017, **9**, 33401-33407.
8. A. S. Ghanem, M. Ba-Shammakh, M. Usman, M. F. Khan, H. Dafallah, M. A. M. Habib and B. A. Al-Maythalony, *Journal of Applied Polymer*, 2020, **137**, 48513.
9. K. Ghosal, R. T. Chern, B. D. Freeman, W. H. Daly and I. I. Negulescu, *Macromolecules*, 1996, **29**, 4360-4369.
10. B. D. Reid, F. A. Ruiz-Trevino, I. H. Musselman, K. J. Balkus and J. P. Ferraris, *Chemistry of Materials*, 2001, **13**, 2366-2373.
11. A. Jomekian, M. Pakizeh, A. R. Shafiee and S. A. A. Mansoori, *Separation and Purification Technology*, 2011, **80**, 556-565.
12. C. Li, J. J. Chew, A. Mahmoud, S. Liu and J. Sunarso, *Journal of Membrane Science*, 2018, **567**, 228-260.
13. H. B. T. Jeazet, C. Staudt and C. Janiak, *Chemical Communications*, 2012, **48**, 2140-2142.
14. N. C. Su, D. T. Sun, C. M. Beavers, D. K. Britt, W. L. Queen and J. J. Urban, *Energy & Environmental Science*, 2016, **9**, 922-931.
15. N. N. R. Ahmad, C. P. Leo, A. W. Mohammad and A. L. Ahmad, *Microporous and Mesoporous Materials*, 2017, **244**, 21-30.
16. B. Zornoza, B. Seoane, J. M. Zamaro, C. Téllez and J. Coronas, *ChemPhysChem*, 2011, **12**, 2781-2785.
17. A. F. Ismail, N. H. Rahim, A. Mustafa, T. Matsuura, B. C. Ng, S. Abdullah and S. A. Hashemifard, *Separation and Purification Technology*, 2011, **80**, 20-31.
18. S. Ishaq, R. Tamime, M. R. Bilad and A. L. Khan, *Separation and Purification Technology*, 2019, **210**, 442-451.
19. S. Li, Y. Liu, D. A. Wong and J. Yang, 2021, **13**, 2539.
20. M. Naseri, S. F. Mousavi, T. Mohammadi and O. Bakhtiari, *Journal of Industrial and Engineering Chemistry*, 2015, **29**, 249-256.
21. M. Etxeberria-Benavides, O. David, T. Johnson, M. M. Łozińska, A. Orsi, P. A. Wright, S. Mastel, R. Hillenbrand, F. Kapteijn and J. Gascon, *Journal of Membrane Science*, 2018, **550**, 198-207.
22. M. Li, X. Zhang, S. Zeng, L. bai, H. Gao, J. Deng, Q. Yang and S. Zhang, *RSC Advances*, 2017, **7**, 6422-6431.
23. M. van Essen, L. van den Akker, R. Thür, M. Houben, I. F. J. Vankelecom, Z. Borneman and K. Nijmeijer, *Separation and Purification Technology*, 2021, **260**, 118103.
24. H. B. Tanh Jeazet, S. Sorribas, J. M. Román-Marín, B. Zornoza, C. Téllez, J. Coronas and C. Janiak, *European Journal of Inorganic Chemistry*, 2016, **2016**, 4363-4367.

25. M. Sarfraz and M. Ba-Shammakh, *Journal of the Taiwan Institute of Chemical Engineers*, 2016, **65**, 427-436.
26. M. Sarfraz and M. Ba-Shammakh, *Journal of Membrane Science*, 2016, **514**, 35-43.
27. M. Sarfraz and M. Ba-Shammakh, *Arabian Journal for Science and Engineering*, 2016, **41**, 2573-2582.
28. M. Sarfraz and M. Ba-Shammakh, *Journal of Industrial and Engineering Chemistry*, 2016, **36**, 154-162.
29. A. Guo, Y. Ban, K. Yang, Y. Zhou, N. Cao, M. Zhao and W. Yang, *Journal of Membrane Science*, 2020, **601**, 117880.
30. A. L. Khan, A. Cano-Odena, B. Gutiérrez, C. Minguillón and I. F. J. Vankelecom, *Journal of Membrane Science*, 2010, **350**, 340-346.
31. M. Pakizeh, A. N. Moghadam, M. R. Omidkhah and M. Namvar-Mahboub, *Korean Journal of Chemical Engineering*, 2013, **30**, 751-760.
32. R. Abedini, M. Omidkhah and F. Dorosti, *RSC Advances*, 2014, **4**, 36522-36537.
33. Z. Kang, Y. Peng, Z. Hu, Y. Qian, C. Chi, L. Y. Yeo, L. Tee and D. Zhao, *Journal of Materials Chemistry A*, 2015, **3**, 20801-20810.
34. J. Sánchez-Laínez, B. Zornoza, S. Friebe, J. Caro, S. Cao, A. Sabetghadam, B. Seoane, J. Gascon, F. Kapteijn, C. Le Guillouzer, G. Clet, M. Daturi, C. Téllez and J. Coronas, *Journal of Membrane Science*, 2016, **515**, 45-53.
35. H. Rajati, A. H. Navarchian and S. Tangestaninejad, *Chemical Engineering Science*, 2018, **185**, 92-104.
36. I. Ilicak, M. S. Boroglu, A. Durmus and I. Boz, *Journal of Natural Gas Science and Engineering*, 2021, **91**, 103941.
